# Supplementary material for: DUOGLOBE: One‐Year Outcomes in a Real‐World Study of Levodopa Carbidopa Intestinal Gel for Parkinson's Disease
Source: PubMed Central journal article supplement — Mov Disord Clin Pract. 2021 Sep 12;8(7):1061–74. doi: 10.1002/mdc3.13239 (PMC8485588; doi:10.1002/mdc3.13239), 2021-09-12
Supplement: MDC3-8-1061-s001.pdf [file MDC3-8-1061-s001.pdf]

## **DUOGLOBE: One-year Outcomes in a Real-World Study of Levodopa Carbidopa Intestinal Gel for Parkinson's Disease**

David G Standaert, MD, PhD<sup>1</sup>; Jason Aldred, MD<sup>2</sup>; Marieta Anca-Herschkovitsch, MD<sup>3</sup>; Paul Bourgeois, MD<sup>4</sup>; Esther Cubo, MD, PhD<sup>5</sup>; Thomas L Davis, MD<sup>6</sup>; Robert Iansek, BMedSci, MBBS, PhD, FRACP, OAM<sup>7</sup>; Norbert Kovács, MD, DSc<sup>8</sup>; Francesco E. Pontieri, MD<sup>9</sup>; Mustafa S Siddiqui, MD<sup>10</sup>; Mihaela Simu, MD<sup>11</sup>; Lars Bergmann, MD<sup>12</sup>; Pavnit Kukreja, PharmD<sup>12</sup>; Weining Z Robieson, PhD<sup>12</sup>; K Ray Chaudhuri, MD, DSc<sup>13</sup>

### **Affiliations:**

<sup>1</sup>University of Alabama at Birmingham, Birmingham, AL, USA; <sup>2</sup>Selkirk Neurology, Spokane, WA, USA; <sup>3</sup>Edith Wolfson Medical Center, Holon, Israel; <sup>4</sup>Department of Neurology AZ Groeninge, Kortrijk, Belgium; <sup>5</sup>Neurology Department, Hospital Universitario Burgos, Burgos, Spain; <sup>6</sup>Vanderbilt University Medical Center, Nashville, TN, USA; <sup>7</sup>Kingston Centre, Monash Health, Melbourne, Victoria, Australia; <sup>8</sup>University of Pécs, Pécs, Hungary; <sup>9</sup>Sapienza University of Rome, Rome, Italy; <sup>10</sup>Wake Forest School of Medicine, Winston Salem, NC, USA; <sup>11</sup>Victor Babes University of Medicine and Pharmacy, Timisoara, Romania; <sup>12</sup>AbbVie Inc., North Chicago, IL, USA; <sup>13</sup>Parkinson's Foundation Centre of Excellence, King's College Hospital, and King's College Institute of Psychiatry, Psychology & Neuroscience, London, UK

## Supplemental Figures

Supplemental Figure 1. Study schematic.

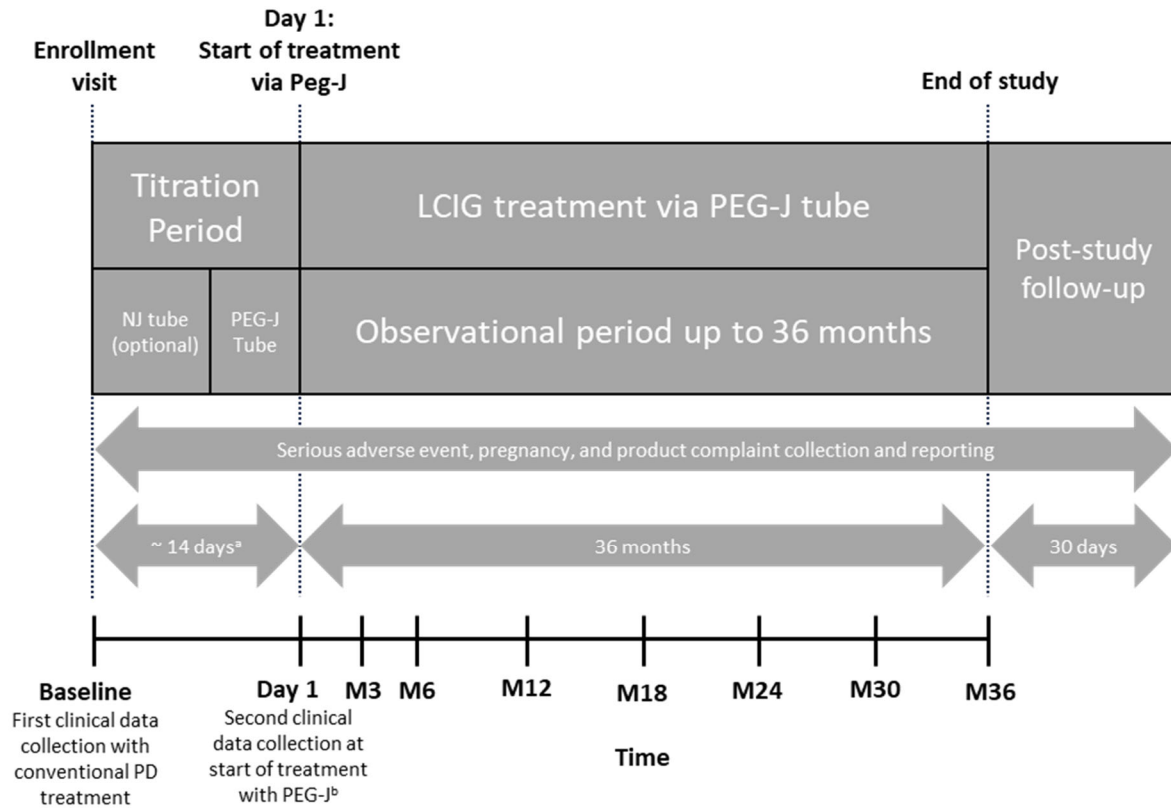

<sup>a</sup>Approximately 14 days or as recommended by the physician according to local reimbursement guidelines.

<sup>b</sup>Effectiveness data only for patients with prior NJ treatment phase.

LCIG = levodopa-carbidopa intestinal gel; M = month; NJ = nasojejunal; PD = Parkinson's disease; PEG-J = percutaneous endoscopic gastrostomy with jejunal extension tube.

**Supplemental Figure 2.** Mean (SE) change from baseline in "Off" time by (A) age, (B) sex, and (C) disease duration at indicated timepoints.

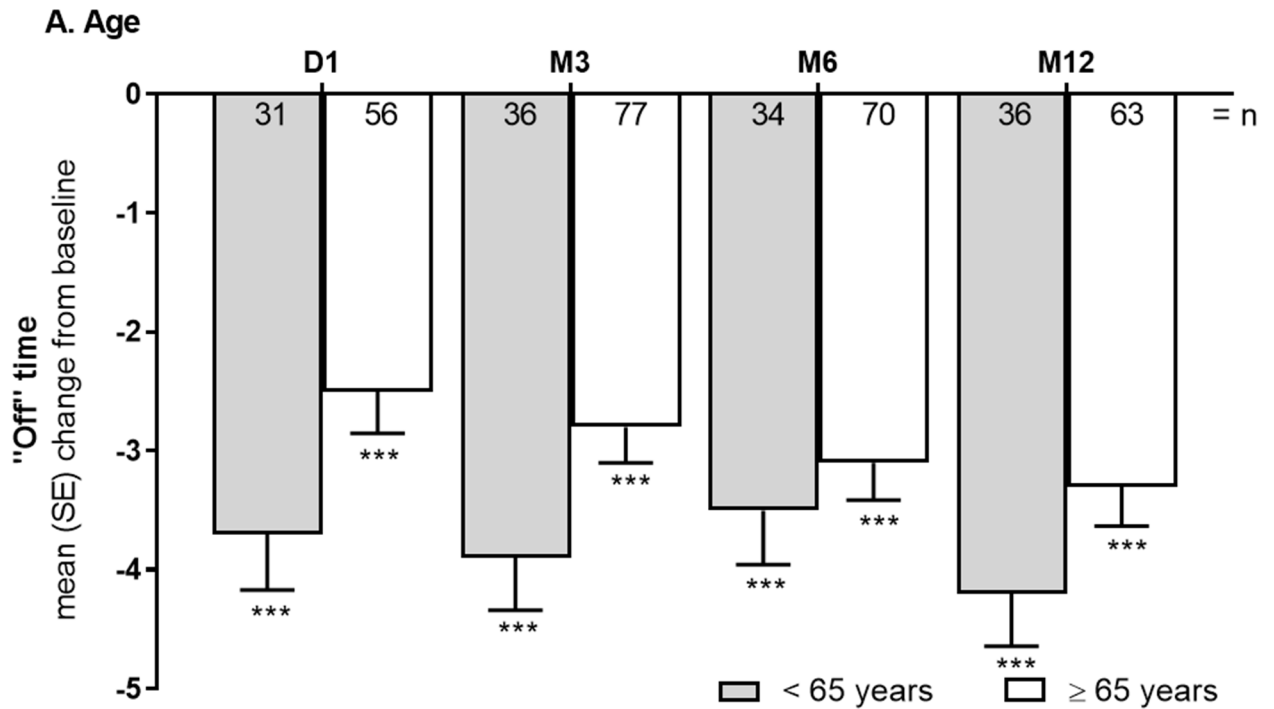

BL mean  $\pm$  SE "Off" time: < 65 years (n = 40;  $5.6 \pm 2.9$ ) and  $\geq$  65 years (n = 85;  $6.1 \pm 3.4$ ). Comparison between groups repeated measures model:  $P = .467$ .

### B. Sex

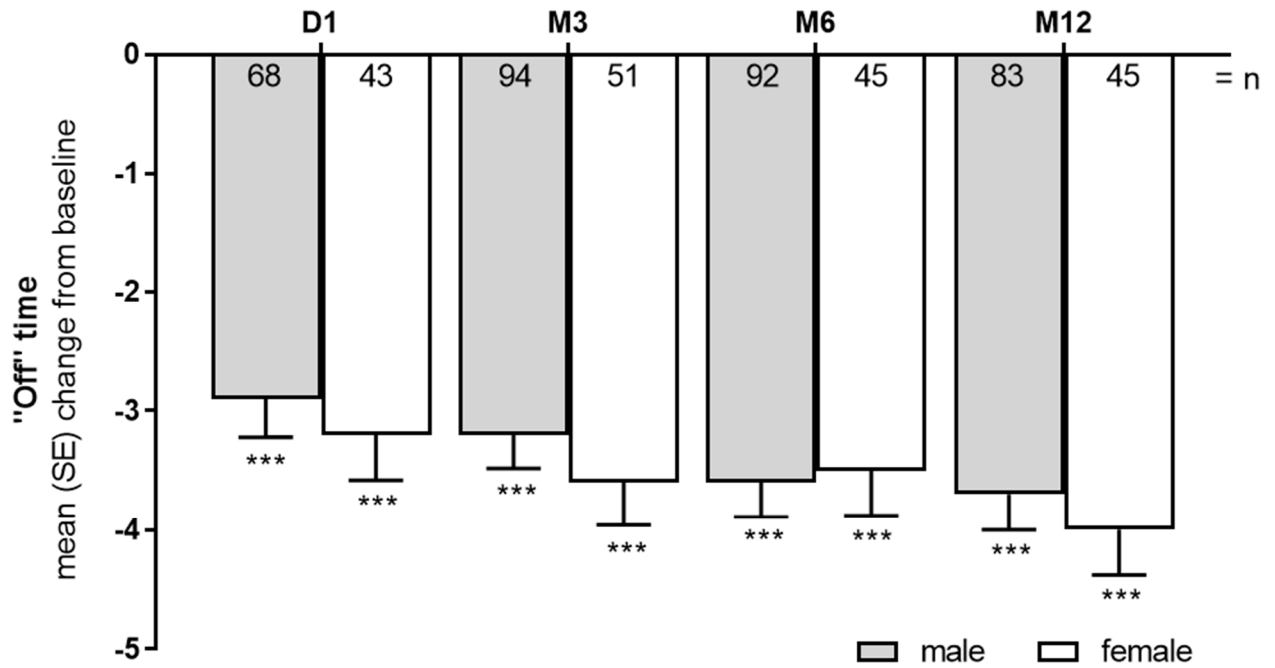

BL mean  $\pm$  SE "Off" time: male (n = 104;  $5.9 \pm 3.5$ ) and female (n = 60;  $6.2 \pm 3.2$ ). Comparison between groups repeated measures model:  $P = .379$ .

### C. PD Duration

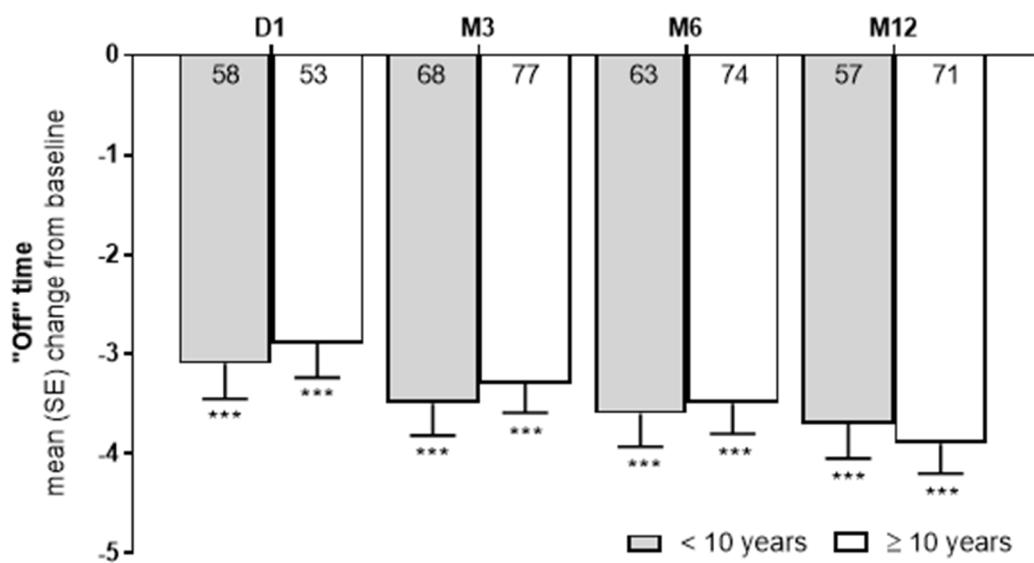

BL mean  $\pm$  SE "Off" time: < 10 years (n = 78;  $6.0 \pm 3.6$ ) and  $\geq 10$  years (n = 86;  $6.0 \pm 3.2$ ). Comparison between groups repeated measures model:  $P = .891$ .

$P$  values indicate significant difference compared with baseline using repeated measures model that includes country visit baseline subgroup, the baseline\*visit, and the subgroup\*visit interaction:  $P \leq .001$  (\*\*\*). BL = baseline; LCIG = levodopa-carbidopa intestinal gel; M = month.

**Supplemental Figure 3.** Motor and non-motor symptoms in patients treated with LCIG stratified by baseline H&Y score.

**A. "Off" time**

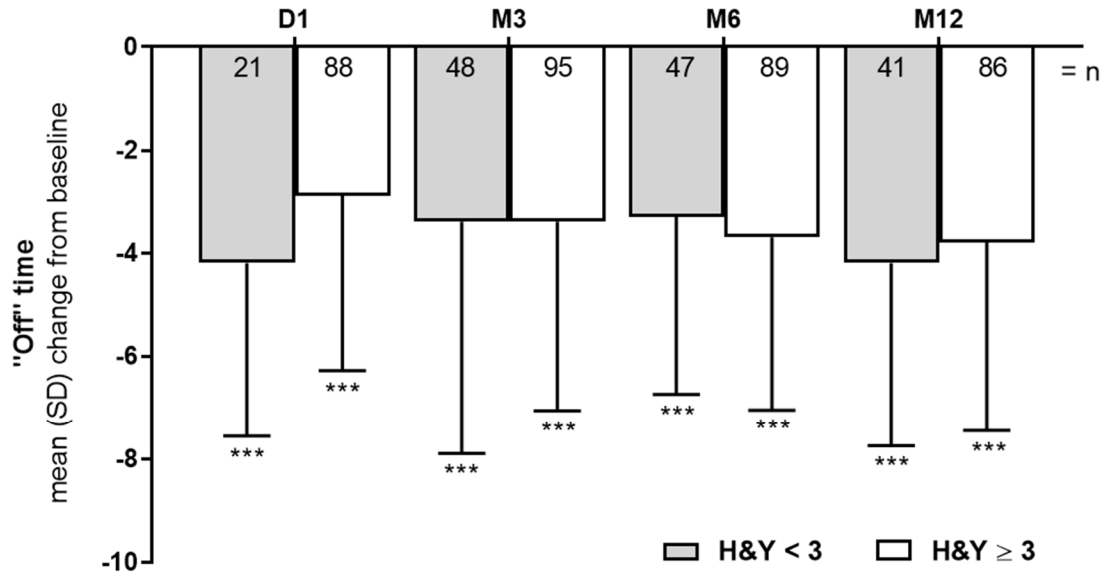

BL mean ± SD "Off" time: H&Y < 3 (n = 49; 5.6 ± 3.6) and H&Y ≥ 3 (n = 113; 6.2 ± 3.3).

**B. Dyskinesia**

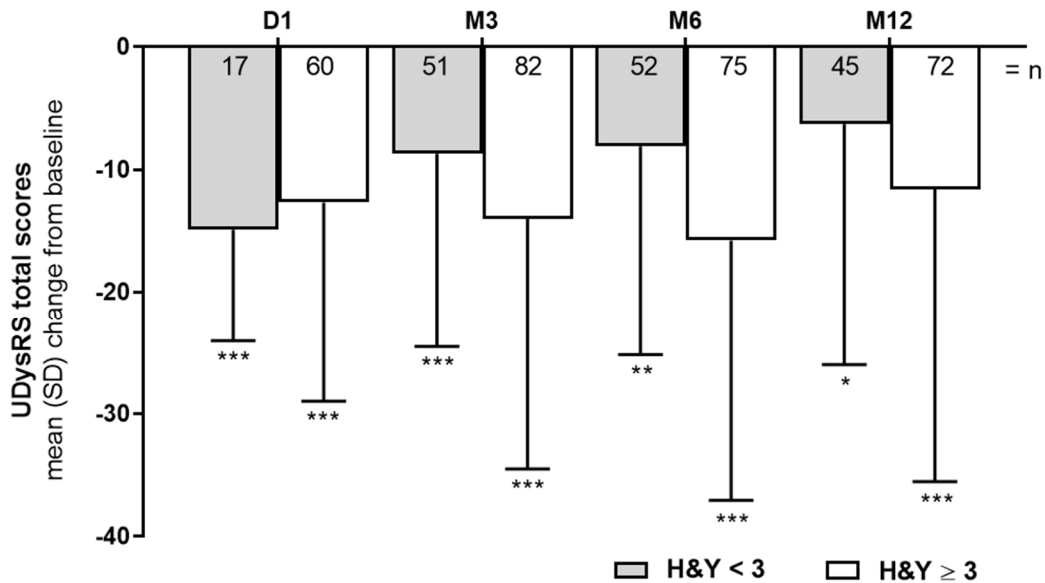

BL mean ± SD UDysRS total score: H&Y < 3 (n = 53; 32.5 ± 16.6) and H&Y ≥ 3 (n = 98; 34.4 ± 23.4).

### C. Axial symptoms

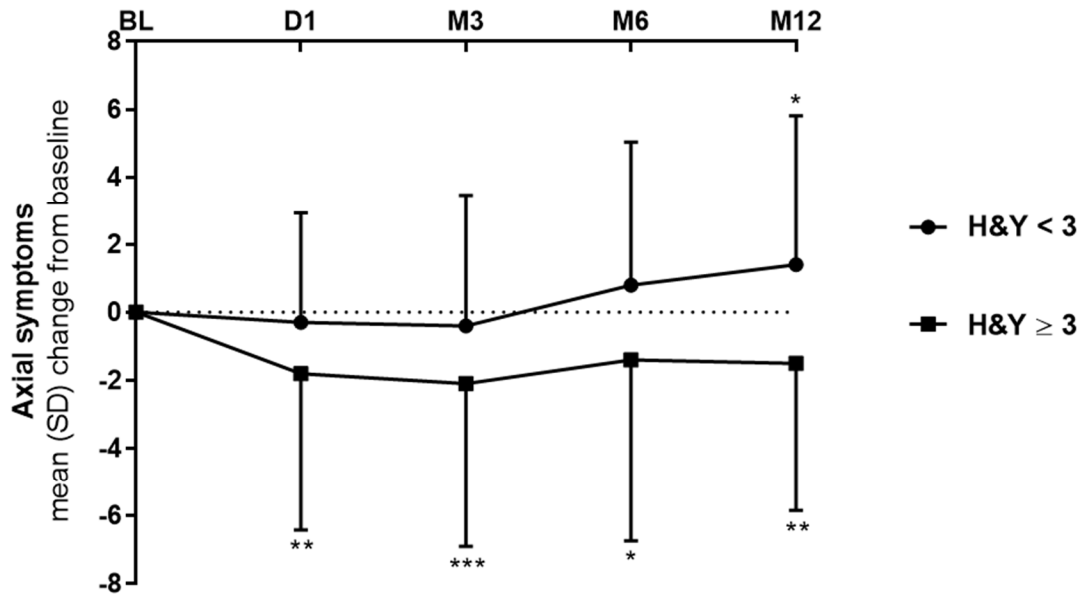

BL mean  $\pm$  SD axial symptoms score: H&Y < 3 (n = 54;  $7.8 \pm 4.1$ ) and H&Y  $\geq$  3 (n = 114;  $14.3 \pm 6.4$ ).

### D. NMSS total score

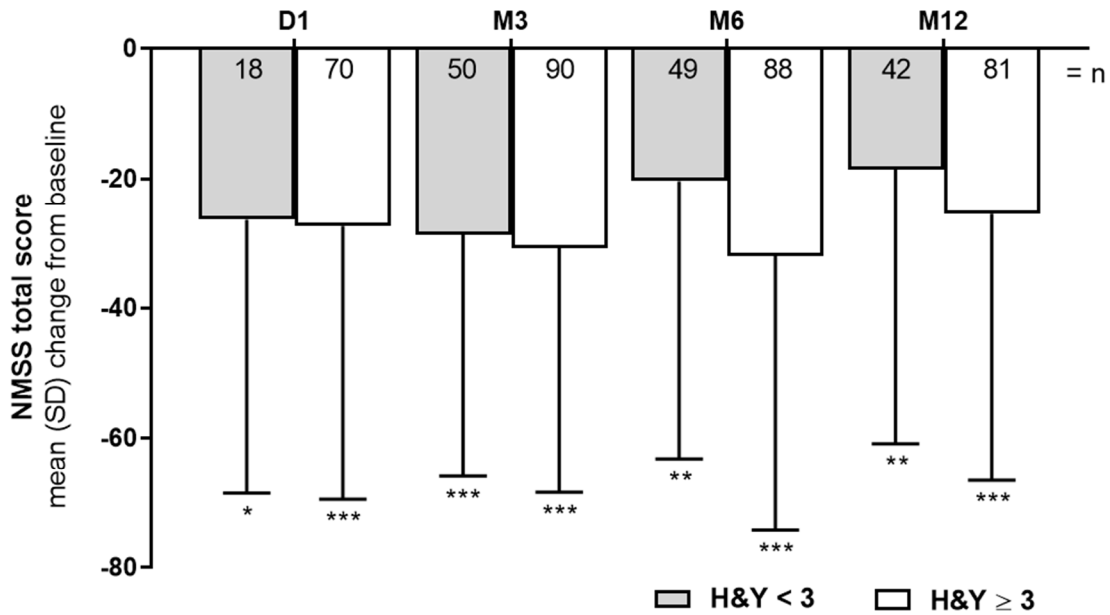

BL mean  $\pm$  SD NMSS total score: H&Y < 3 (n = 51;  $81.3 \pm 49.6$ ) and H&Y  $\geq$  3 (n = 110;  $91.3 \pm 52.1$ ).

E. HR-QoL

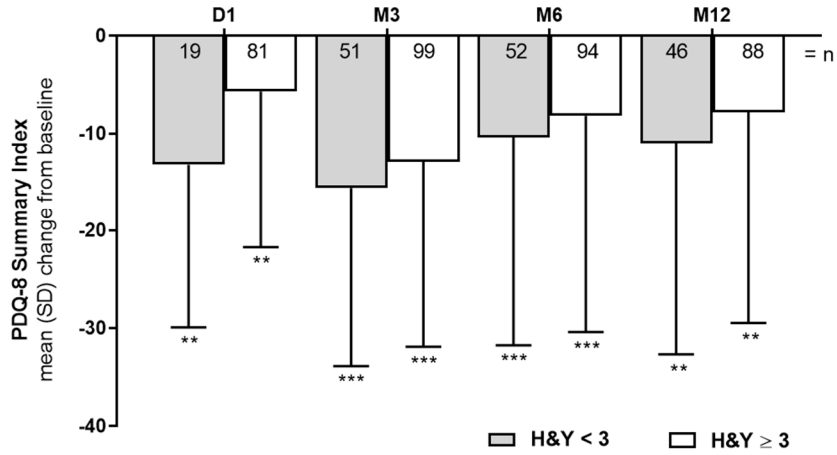

BL mean  $\pm$  SD PDQ-8 summary index: H&Y < 3 (n = 53; 41.0  $\pm$  17.6) and H&Y  $\geq$ 3 (n = 116; 47.0  $\pm$  18.2).

Axial symptom scores are the sum of items 18, 22, 27-30 on UPDRS part III. *P* values indicate significant difference compared with baseline using:  $P \leq .001$  (\*\*\*). BL = baseline; D = day; H&Y = Hoehn and Yahr; HR-QoL = health-related quality of life; LCIG = levodopa-carbidopa intestinal gel; M = month; NMSS = Non-Motor Symptom Scale; PDQ-8 = 8-item Parkinson's Disease Questionnaire; UDysRS = Unified Dyskinesia Rating Scale; UPDRS = Unified Parkinson's Disease Rating Scale.



**Supplemental Figure 4.** Mean (SE) change in PDQ-8 summary index scores by (A) age, (B) sex, and (C) disease duration at indicated timepoints.

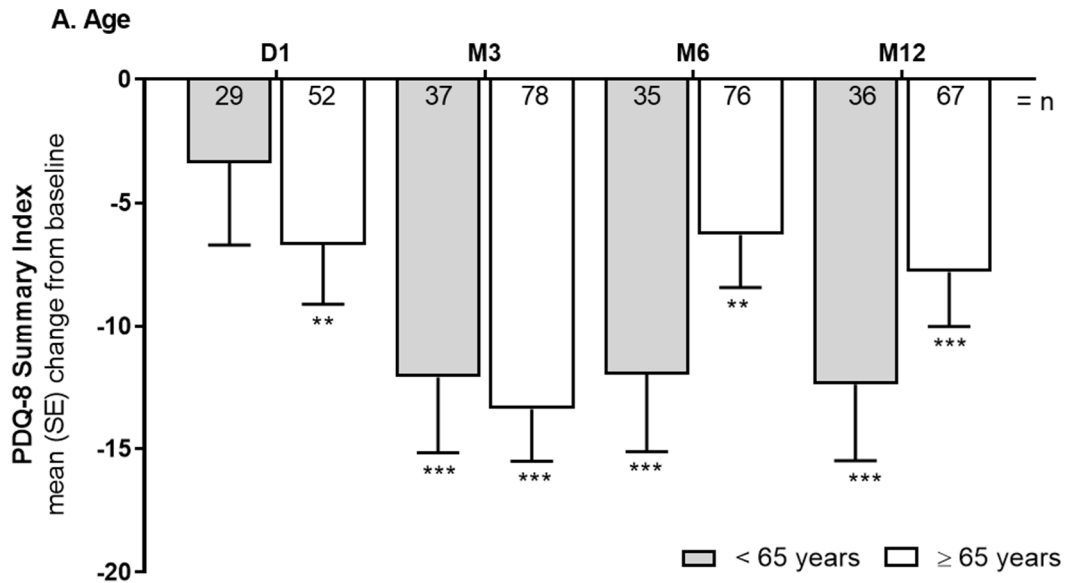

BL mean  $\pm$  SE PDQ-8 summary index: < 65 years (n = 40; 49.1  $\pm$  17.2) and  $\geq$  65 years (n = 89; 44.0  $\pm$  18.3). Comparison between groups repeated measures model:  $P = .745$ .

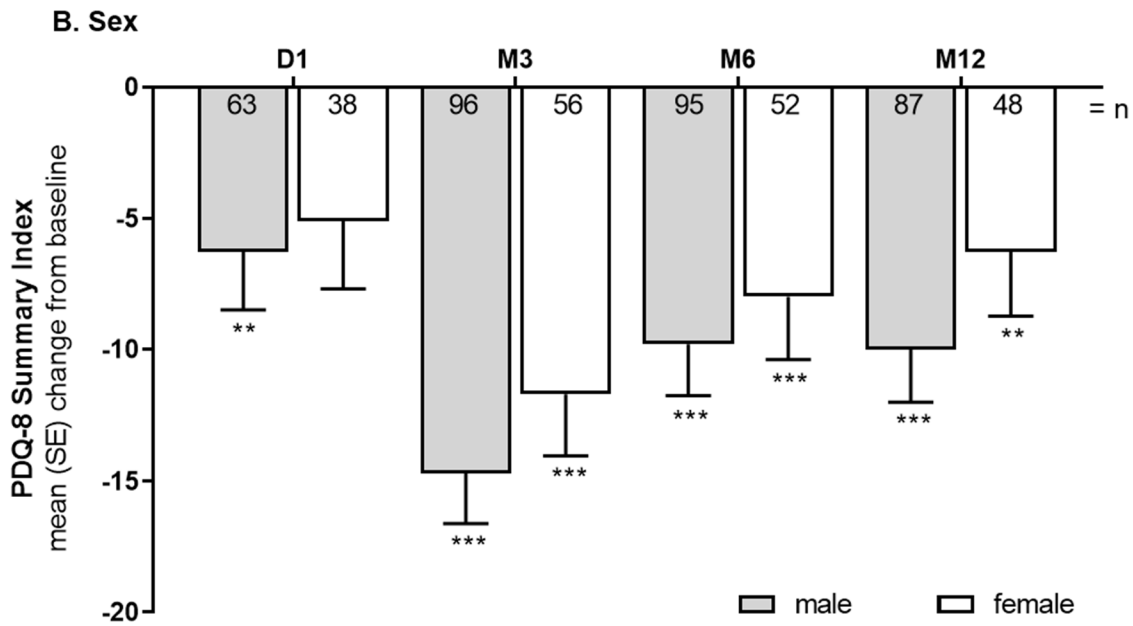

BL mean  $\pm$  SE PDQ-8 summary index: male (n = 108; 45.1  $\pm$  17.8) and female (n = 63; 45.1  $\pm$  18.7). Comparison between groups repeated measures model:  $P = .829$ .

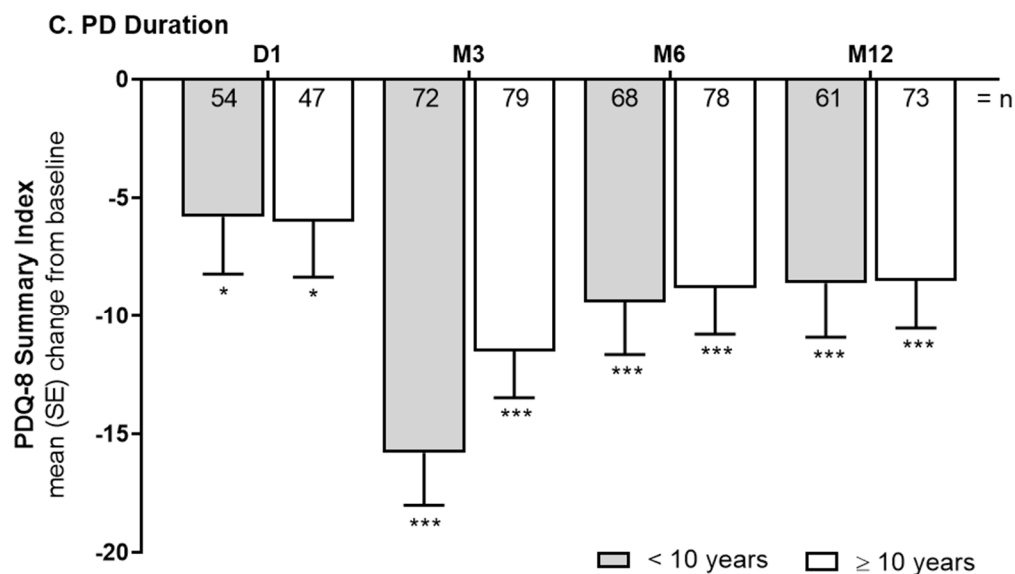

BL mean  $\pm$  SE PDQ-8 summary index: < 10 years (n = 82;  $43.9 \pm 19.3$ ) and  $\geq 10$  years (n = 88;  $46.1 \pm 17.1$ ). Comparison between groups repeated measures model:  $P = .257$ .

*P* values indicate significant difference compared with baseline using repeated measures model that includes country visit baseline subgroup, the baseline\*visit, and the subgroup\*visit interaction:  $P \leq .001$  (\*\*\*),  $P \leq .01$  (\*\*), and  $P \leq .05$  (\*). BL = baseline; D = day; LCIG = levodopa-carbidopa intestinal gel; M = month; PDQ-8 = 8-item Parkinson's Disease Questionnaire; SE = standard error.
